**First International Symposium of The International College of Pediatrics**  
Helsinki, Finland, June 18–22, 1978

*Finlandia Hall*

Plenary Sessions; Symposia; Round-Table Discussions; Free Papers.

For information contact:

*Katarina Michelsson*, MD General Secretary, First International Symposium of The International College of Pediatrics, Children's Hospital, 11 Department of Pediatrics, Stenbackstreet 11, *SF-00290 Helsinki, 29* (Finland);

*George D. Maragos*, MD, MSc, Department of Pediatrics, Creighton University School of Medicine, *Omaha, NB 68108* (USA).
